# Supplementary material for: TGF-β promotes microtube formation in glioblastoma through thrombospondin 1
Source: PubMed Central journal article supplement — Neuro Oncol. 2021 Sep 20;24(4):541–53. doi: 10.1093/neuonc/noab212 (PMC8972291; doi:10.1093/neuonc/noab212), 2021-09-20
Supplement: noab212_suppl_supplementary_table_s2.pdf [file noab212_suppl_supplementary_table_s2.pdf]

## Tube density: Linear mixed effects model

| Fixed effect                              | $\beta$<br>Estimated coefficient       | $R_{\beta^*}^2$<br>Proportion of variance explained |
|-------------------------------------------|----------------------------------------|-----------------------------------------------------|
| pSMAD3 <sup>+</sup> cells/mm <sup>2</sup> | 10.253<br>(4.958, 15.547)              | 0.230<br>(0.124, 0.351)                             |
| Cell density                              | -0.940<br>(-2.318, 0.439)              | 0.017<br>(0.000, 0.084)                             |
| pSMAD3 <sup>+</sup> × Cell density        | -0.005<br>(-0.007, -0.003)             | 0.240<br>(0.132, 0.361)                             |
| Intercept                                 | 23 386.540<br>(19 159.800, 27 613.280) |                                                     |
| <hr/>                                     |                                        |                                                     |
| Random Effects                            | Std. deviance                          |                                                     |
| <hr/>                                     |                                        |                                                     |
| Due to patient                            |                                        |                                                     |
| Intercept                                 | 5302.388                               |                                                     |
| pSMAD3 <sup>+</sup> cells/mm <sup>2</sup> | 5.015                                  |                                                     |
| <hr/>                                     |                                        |                                                     |
| Observations                              | 140                                    |                                                     |
| Log Likelihood                            | -1 464.308                             |                                                     |

*Note:*

Cell density measured as cells/mm<sup>2</sup>.  
 Tube density measured as  $\mu\text{m}/\text{mm}^2$ .  
 Independent variables centered to their mean.
